# Supplementary material for: Divergent sequences of tetraspanins enable plants to specifically recognize microbe-derived extracellular vesicles
Source: PubMed Central journal article supplement (PMC10423219; doi:10.1038/s41467-023-40623-0), 2023-08-12
Supplement: 41467_2023_40623_MOESM3_ESM.pdf [file 41467_2023_40623_MOESM3_ESM.pdf]

### **Description of Additional Supplementary Files**

**Supplementary Data 1.** LC-MS data for *P. sojae* EVs-associated proteins. Related to Figure 1.

**Supplementary Data 2.** Transcription levels of 95 genes. Related to Figure 1.

**Supplementary Data 3.** The amino acid sequences of PsTET3 and truncated mutants.

**Supplementary Data 4.** Sequence information of PsTETs.

**Supplementary Data 5.** Primers used in this study.
